# Supplementary material for: Recovery of biologically active compounds from stinging nettle leaves part I: supercritical fluid extraction
Source: Research Square preprint supplement (doi:10.21203/rs.3.rs-507151/v1), 2021-05-13
Supplement: Supplementary file 1 [file 81844e61fddcd969151f768b.docx]

**Recovery of biologically active compounds from stinging nettle leaves part I: supercritical fluid extraction**

Saša Đurović1,*, Saša Šorgić2, Saša Popov2, Lato Pezo1, Stevan Blagojević1, Zoran Zeković3

1Institute of General and Physical Chemistry, Studentski trg 12/V, 11158 Belgrade, Serbia

2Oneological Laboratory, Heroja Pinkija, 26300 Vršac, Serbia

3University of Novi Sad, Faculty of Technology, Bulevar Cara Lazara 1, 21000 Novi Sad, Serbia

*Correspondence:

*Laboratory of Chromatography, Institute of General and Physical Chemistry, Studentski trg 12/V, 11158 Belgrade, Republic of Serbia, Tel: +381659577200, e-mail: [sasatfns@uns.ac.rs](mailto:sasatfns@uns.ac.rs)

Table 1S. Supercritical fluid extraction and separation conditions

| Parameter | Extracts | | | | | |
| --- | --- | --- | --- | --- | --- | --- |
| 1 | 2 | 3 | 4 | 5 | 6 |
| Pressure (bar) | 100 | 100 | 200 | 200 | 300 | 300 |
| Temperature (°C) | 40 | 60 | 40 | 60 | 40 | 60 |
| Density (g/cm3) | 0.629 | 0.290 | 0.840 | 0.724 | 0.910 | 0.830 |
| Separation parameters | | | | | | |
| Pressure (bar) | 15 | 15 | 15 | 15 | 15 | 15 |
| Temperature (°C) | 23 | 23 | 23 | 23 | 23 | 23 |

Table 2S. Yields of extraction processes under the conditions given in Table 1S

| Time (min) | Sample/Extraction yield (g/100 g SN) | | | | | |
| --- | --- | --- | --- | --- | --- | --- |
| 1 | 2 | 3 | 4 | 5 | 6 |
| 15 | 0.81448 | 0.42512 | 1.98040 | 1.80396 | 2.13040 | 3.19648 |
| 30 | 0.86514 | 0.47216 | 2.14920 | 2.22628 | 2.56800 | 3.43538 |
| 45 | 1.04630 | 0.50034 | 2.35324 | 2.37652 | 2.75530 | 3.58072 |
| 60 | 1.06240 | 0.52064 | 2.49312 | 2.47996 | 2.84832 | 3.85328 |
| 90 | 1.15568 | 0.57680 | 2.60616 | 2.69176 | 3.10490 | 3.98368 |
| 120 | 1.16068 | 0.63336 | 2.66764 | 2.93456 | 3.25386 | 4.27550 |
| 150 | 1.17268 | 0.64010 | 2.69720 | 3.09940 | 3.44988 | 4.64814 |
| 180 | 1.22824 | 0.66959 | 2.90648 | 3.21444 | 3.48528 | 4.65158 |
| 240 | 1.32436 | 0.78740 | 3.14328 | 3.95860 | 3.61174 | 5.01812 |
| 300 | 1.45860 | 0.98660 | 3.20380 | 4.23500 | 3.78120 | 5.24280 |

Table 3S. Abbreviations and names of analyzed fatty acids

| Abbreviation | IUPAC name | Trivial name |
| --- | --- | --- |
| C6:0 | Hexanoic acid | Caproic acid |
| C8:0 | Octanoic acid | Caprylic acid |
| C10:0 | Decanoic acid | Capric acid |
| C11:0 | Undecanoic acid | Undecylic acid |
| C12:0 | Dodecanoic acid | Lauric acid |
| C13:0 | Tridecanoic acid | Tridecylic acid |
| C14:0 | Tetradecanoic acid | Myristic acid |
| C14:1 | *cis*-Δ9-Tetradecenoic acid | Myristoleic acid |
| C15:0 | Pentadecanoic acid | Pentadecylic acid |
| C15:1 | *cis*-Δ10-Pentadecenoic acid | - |
| C16:0 | Hexadecanoic acid | Palmitic acid |
| C16:1 | *cis*-Δ9-Hexadecenoic acid | Palmitoleic acid |
| C17:0 | Heptadecanoic acid | Margaric acid |
| C17:1 | *cis*-Δ10-Heptadecenoic acid | - |
| C18:0 | Oktadecanoic acid | Stearic acid |
| *cis*-C18:1 | *cis*-Δ9-Octadecenoic acid | Oleic acid |
| *trans*-C18:1 | *trans*-Δ11-Octadecenoic acid | Vaccenic acid |
| C18:2 | *cis,cis*-Δ9,12-Octadecadienoic acid | Linoleic acid |
| α-C18:3 n-3 | *cis,cis,cis*-Δ9,12,15-Octadecatrienoic acid | α-Linolenic acid (ALA) |
| γ-C18:3 n-6 | *cis,cis,cis*-Δ6,9,12-Octadecatrienoic acid | γ-Linolenic acid (GLA) |
| C20:0 | Eicosanoic acid | Arachidic acid |
| C20:1 | *cis*-Δ11-Eicosenoic acid | Gondoic acid |
| C20:2 | *cis,cis*-Δ11,14-Eicosadienoic acid | - |
| C20:3 n-6 | *cis,cis,cis*-Δ8,11,14-Eicosatrienoic acid | Dihomo-γ-linolenic acid (DGLA) |
| C20:3 n-3 | *cis,cis,cis*-Δ11,14,17-Eicosatrienoic acid | - |
| C20:4 | *cis,cis,cis,cis*-Δ5,8,11,14-Eicosatetraenoic acid | Arachidonic acid (AA) |
| C20:5 | *cis,cis,cis,cis,cis,*-Δ5,8,11,14,17-Eicosapentaenoic acid | Eicosapentaenoic acid (EPA) |
| C21:0 | Henicosanoic acid | - |
| C22:0 | Docosanoic acid | Behenic acid |
| C22:2 | *cis,cis*-Δ13,16-Docosadienoic Acid | - |
| C22:6 | *cis,cis,cis,cis,cis,cis*-Δ4,7,10,13,16,19-Docosahexaenoic acid | Docosahexaenoic acid (DHA) |
| C23:0 | Tricosanoic acid | Tricosylic acid |
| C24:0 | Tetracosanoic acid | Lignoceric acid, |
| C24:1 | *cis*-Δ15-Tetracosenoic acid | Nervonic acid |
